# Supplementary material
Source: PubMed Central journal article supplement (PMC4185345)
Supplement: cr2014118x2.pdf [file cr2014118x2.pdf]

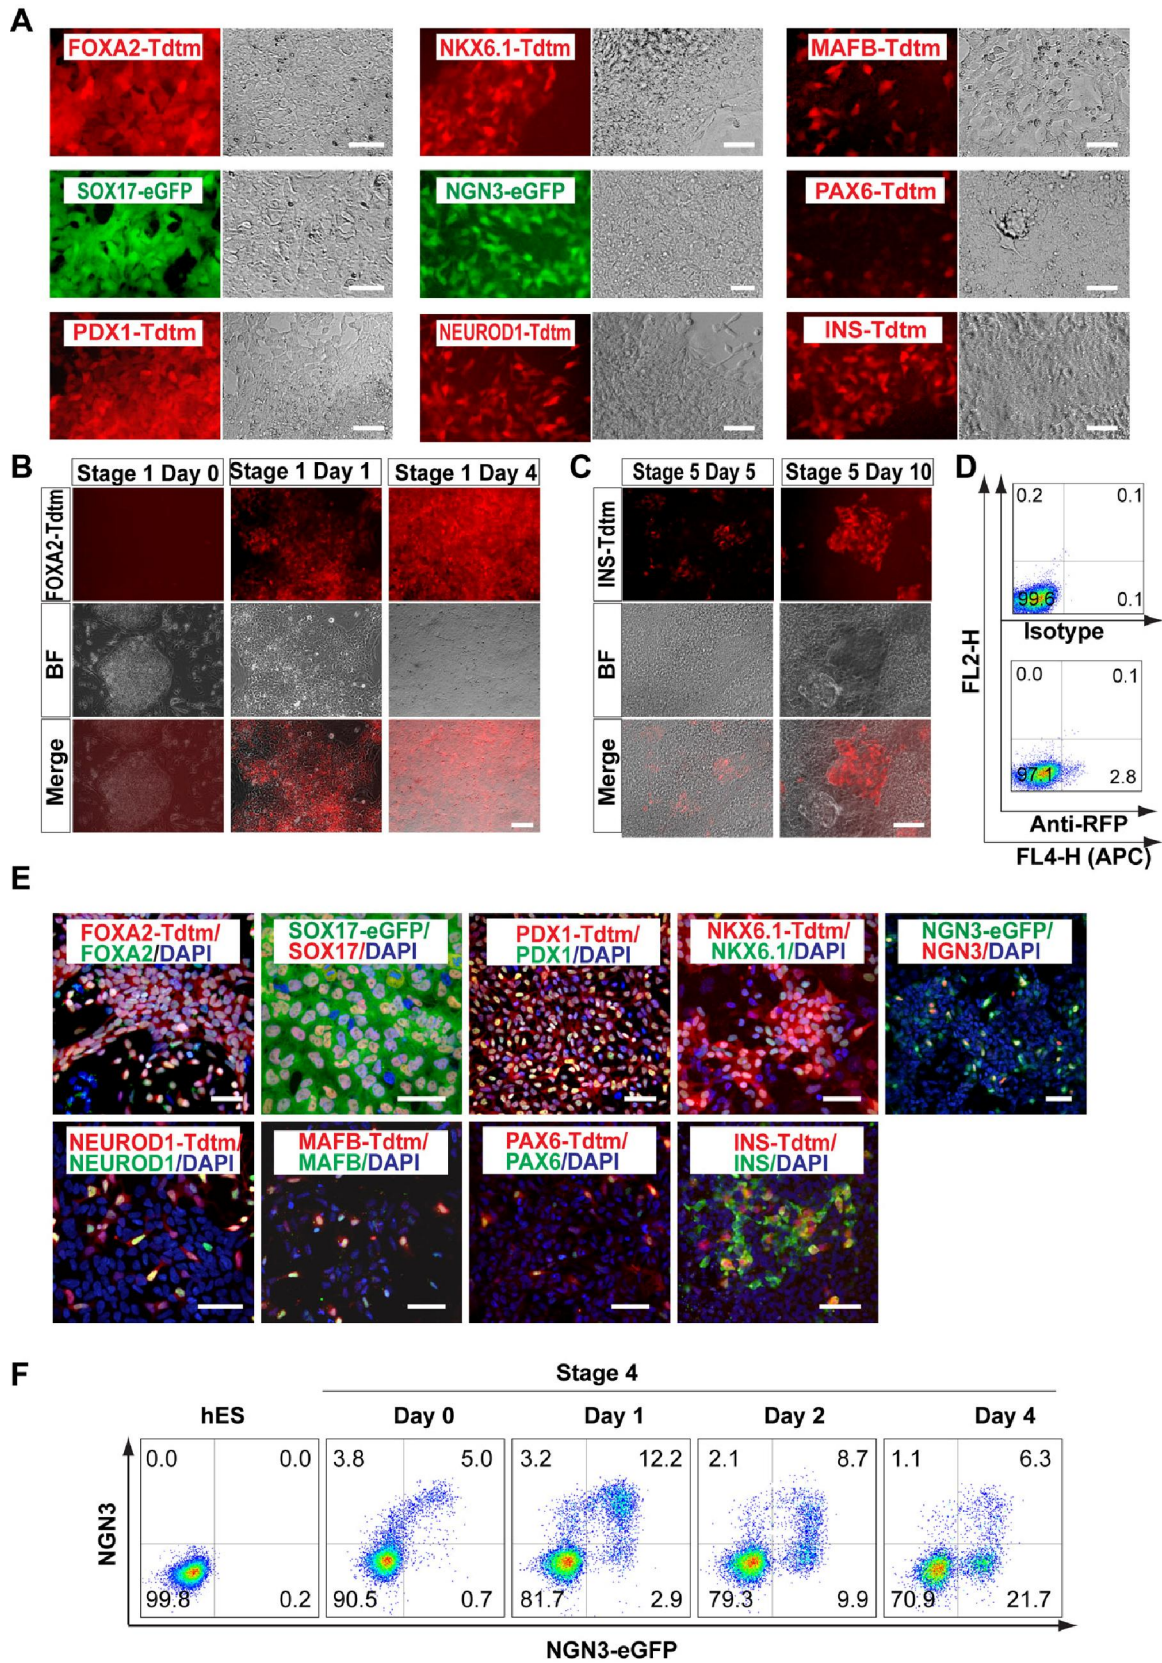

Supplementary information, Figure S2. The expression of fluorescent proteins during the

differentiation of reporter hESC lines into beta cells. (A) The expression of reporter genes from individual loci during hESC differentiation. The expression of *FOXA2-Tdtm* and *SOX17-eGFP* were evaluated at stage (S) 1, day (D) 4; *PDX1-Tdtm* was analyzed at S3, D4; *NKX6.1-Tdtm* and *NEUROD1-Tdtm* were analyzed at S4, D3; *NGN3-eGFP*, *MAFB-Tdtm* were analyzed at S4, D4; *PAX6-Tdtm* was analyzed at S4, D5; and *INS-Tdtm* was evaluated at S5, D5. (B) During the *in vitro* differentiation of the FOXA2-DR cell line, *Tdtm* expression could be detected 24 h after Activin-A treatment. (C) *INS-Tdtm*<sup>+</sup> cells showed a separated pattern at stage 5, day 4 but formed clusters after extended culture. (D) The expression of *PAX6-Tdtm*<sup>+</sup> cell fraction could not be clearly recognized by direct flow cytometric analysis. The amplification of the *Tdtm* signal by an anti-RFP antibody helped to recognize the *PAX6-Tdtm*<sup>+</sup> cells. The anti-RFP antibody was further stained with an APC-conjugated secondary antibody. (E) Co-staining reporter gene expression with endogenous gene expression. These are merged images for Fig 2B. Nuclear staining with DAPI (blue) is shown in the merged images. (F) Time-course flow cytometric analysis of differentiating *NGN3-eGFP* cells throughout stage 4 demonstrated that the agreement between *eGFP*<sup>+</sup> cells and *NGN3*<sup>+</sup> cells varied over time. On day 1, most of the *eGFP*<sup>+</sup> cells expressed *NGN3* and *vice versa*. The percentage of *NGN3*<sup>+</sup> cells among the *eGFP*<sup>+</sup> cells gradually decreased, but the proportion of *eGFP*<sup>+</sup> cells among the *NGN3*<sup>+</sup> cells remained relatively stable. The scale bar represents 50 μm. Abbreviations: INS (INSULIN); *Tdtm* (TdTomato).
