# Supplementary material
Source: PubMed Central journal article supplement (PMC4185345)
Supplement: cr2014118x6.pdf [file cr2014118x6.pdf]

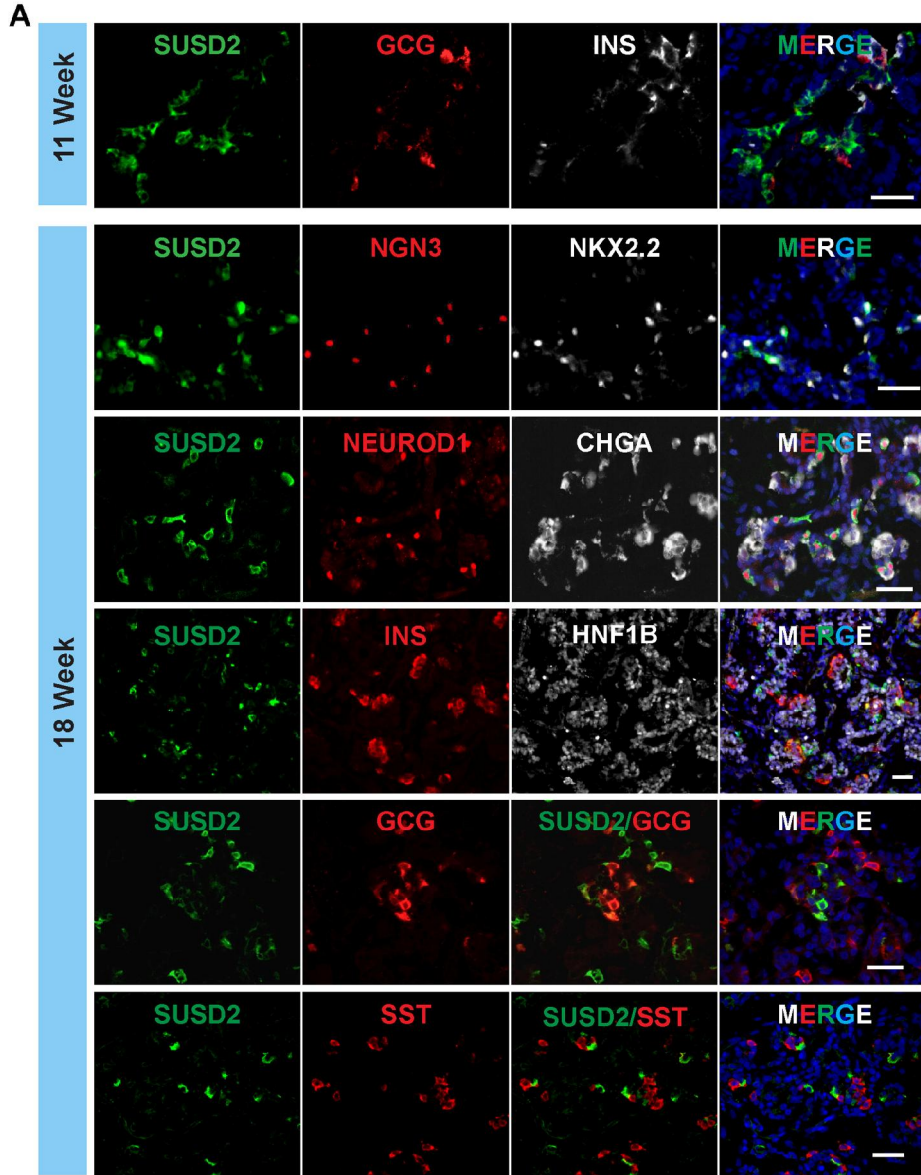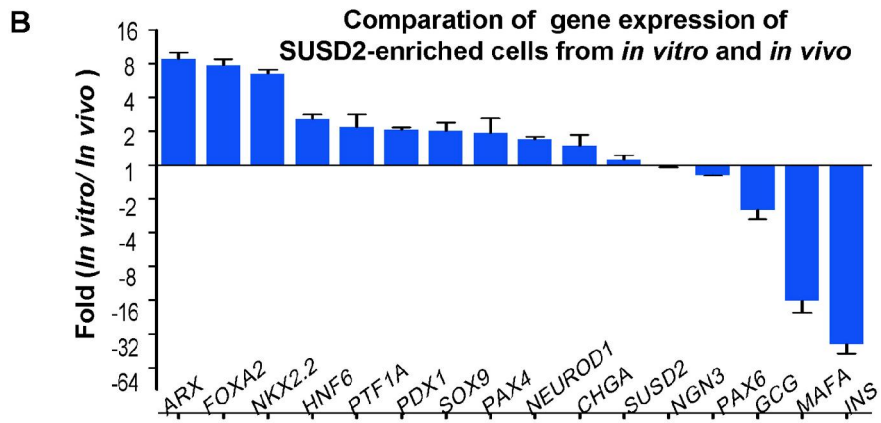

**Supplementary information, Figure S6.** Characterization of SUSD2-expressing cells *in vivo*. (A) Section staining demonstrated that INS-producing and GCG-producing cells were occasionally observed and slightly co-localized with SUSD2<sup>+</sup> cells in the 11-week human fetal pancreas. (B) Section staining of an 18-week human fetal pancreas demonstrated that most of the NEUROD1-expressing cells also express SUSD2; few SUSD2<sup>+</sup> cells express HNF1B; some SUSD2<sup>+</sup> cells expressed hormones such as INS, GCG and SST. Nuclear staining with DAPI (blue) is shown in the merged images. (C) A comparative analysis of gene expression of SUSD2-enriched cells that were derived from *in vivo* and *in vitro* sources; the *in vivo* SUSD2-enriched cells expressed higher levels of hormones and other late-stage endocrine associated genes than the *in vitro* enriched cells (mean ± SEM, n = 3). The scale bar represents 50 μm. Abbreviations: INS (INSULIN); CHGA (CHROMOGRANIN A); GCG (GLUCAGON); SST (SOMATOSTATIN).
