# Supplementary material
Source: PubMed Central journal article supplement (PMC4185345)
Supplement: cr2014118x7.pdf [file cr2014118x7.pdf]

**Supplementary information, Table S1. Fidelity of reporter cell lines**

| <b>Individual gene reporters</b> | <b>Day checked</b> | <b>Endogenous protein expression in marker gene positive cells</b> | <b>Marker gene expression in endogenous protein positive cells</b> | <b>comments</b>                                             |
|----------------------------------|--------------------|--------------------------------------------------------------------|--------------------------------------------------------------------|-------------------------------------------------------------|
| FOXA2-Tdtm                       | Stage 1 day 4      | 99±1%                                                              | 95±4%                                                              |                                                             |
| FOXA2-Tdtm                       | Stage 2 day 3      | 98±2%                                                              | 97±3%                                                              |                                                             |
| FOXA2-Tdtm                       | Stage 3 day 4      | 99±1%                                                              | 97±2%                                                              |                                                             |
| FOXA2-Tdtm                       | Stage 4 day 3      | 98±2%                                                              | 95±5%                                                              |                                                             |
| SOX17-eGFP                       | Stage 1 day 4      | 98±1%                                                              | 97±2%                                                              |                                                             |
| SOX17-eGFP                       | Stage 2 day 3      | 94±5%                                                              | 98±1%                                                              |                                                             |
| PDX1- Tdtm                       | Stage 3 day 4      | 96±4%                                                              | 99±1%                                                              |                                                             |
| PDX1- Tdtm                       | Stage 4 day 3      | 90±8%                                                              | 98±2%                                                              | Some pdx1 <sup>low/-</sup> Tdtm <sup>+</sup> cells existed. |
| NKX6.1- Tdtm                     | Stage 4 day 3      | 98±2%                                                              | 97±3%                                                              |                                                             |
| NGN3-eGFP                        | Stage 4 day 1      | 80±11%                                                             | 82±5%                                                              |                                                             |
| NGN3-eGFP                        | Stage 4 day 3      | 21%±7%                                                             | 85±4%                                                              |                                                             |
| NEUROD1-Tdtm                     | Stage 4 day 3      | 99±1%                                                              | 96±4%                                                              |                                                             |
| MAFB- Tdtm                       | Stage 4 day 4      | 98±2%                                                              | 95±2%                                                              |                                                             |
| PAX6- Tdtm                       | Stage 4 day 5      | 97±2%                                                              | 92±2%                                                              |                                                             |
| INS- Tdtm                        | Stage 5 day 5      | 96±4%                                                              | 95±4%                                                              |                                                             |
