# Supplementary material
Source: PubMed Central journal article supplement (PMC4185345)
Supplement: cr2014118x9.pdf [file cr2014118x9.pdf]

**Supplementary information, Table S3. Primary antibodies used in this study**

| Antibody  | Host        | Vendor        | Cat#                  |
|-----------|-------------|---------------|-----------------------|
| PDX1      | Goat        | R&D           | AF2419                |
| NKX2.2    | Mouse       | DSHB          | 74.5A5-c              |
| HNF1B     | Goat        | Santa Cruz    | sc-7411               |
| FOXA2     | Goat        | Santa Cruz    | sc-6554               |
| FOXA2     | Rabbit      | Abcam         | ab40874               |
| HNF6      | Rabbit      | Santa Cruz    | sc-13050              |
| NEUROD1   | Goat        | R&D           | AF2746                |
| NKX6.1    | Mouse       | DSHB          | F55A12-c              |
| NGN3      | Mouse       | DSHB          | F25A1B3               |
| ISL1      | Mouse       | DSHB          | 39.4D5-c              |
| SOX9      | Rabbit      | Santa Cruz    | sc-20095              |
| GCG       | Rabbit      | Newmarker     | RB-1422-A0            |
| PAX6      | mouse       | DSHB          | chick PAX6 a.a. 1-223 |
| C-PEP     | Mouse       | Novusbio      | NB500-413             |
| MAFB      | Rabbit      | Abcam         | sc-22830              |
| SUSD2-PE  | Mouse       | Biologend     | 327401                |
| INSULIN   | Guinea pig  | DAKO          | A0564                 |
| SOX17     | Goat        | R&D           | AF1924                |
| SOX17     | Mouse       | BD Pharmingen | 562594                |
| SOX2      | Goat        | Santa Cruz    | sc-17320              |
| HNF6      | Mouse       | Abcam         | ab-87420              |
| CHGA      | Rabbit      | ZSGB-Bio      | ZA-0507               |
| OCT4      | Mouse       | Santa         | sc-5279               |
| SUSD2-PE  | Mouse(IgG1) | Biologend     | 327406                |
| SUSD2-APC | Mouse(IgG1) | Biologend     | 327408                |
| SUSD2     | Mouse(IgG1) | Biologend     | 327406                |
| IgG1-PE   | Mouse(IgG1) | Biologend     | 400112                |
| IgG1-APC  | Mouse(IgG1) | Biologend     | 406610                |
| RFP       | rabbit      | Rockland      | 600-401-379           |
| GFP       | chicken     | Abcam         | AB13970               |
| HRH1      | Mouse(IgG1) | R&D           | FAB4726P              |
| PLXNA2    | Goat        | R&D           | AF5486                |
