# Supplementary material
Source: PubMed Central journal article supplement (PMC4185345)
Supplement: cr2014118x10.pdf [file cr2014118x10.pdf]

**Supplementary information, Table S4. Primers used for Q-PCR**

| Gene symbol    | 5'-Primers                | 3'-Primers               |
|----------------|---------------------------|--------------------------|
| <i>GAPDH</i>   | TGCACCACCAACTGCTTAGC      | GGCATGGACTGTGGTCATGAG    |
| <i>OCT4</i>    | CCGAAAGAGAAAGCGAACCAG     | ATGTGGCTGATCTGCTGCAGT    |
| <i>SOX17</i>   | GCATGACTCCGGTGTGAATCT     | TCACACGTCAGGATAGTTGCAGT  |
| <i>HNF4A</i>   | ACTACATCAACGACCGCCAGT     | ATCTGCTCGATCATCTGCCAG    |
| <i>HNF6</i>    | TGTGGAAGTGGCTGCAGGA       | TGTGAAGACCAACCTGGGCT     |
| <i>NKX6.1</i>  | GGGCTCGTTTGGCCTATTCGTT    | CCACTTGGTCCGGCGGTTCT     |
| <i>PDX1</i>    | CGGAAC TTTCTATTTAGGATGTGG | AAGATGTGAAGGTCATACTGGCTC |
| <i>PTF1A</i>   | GAAGGTCATCATCTGCCATCG     | GGCCATAATCAGGGTTCGCT     |
| <i>SOX9</i>    | CTGAGCTCGGCGTTGTG         | AAAGGCTACGACTGGACG       |
| <i>NURODD1</i> | ATTGCACCAGCCCTTCCTTTGAT   | ACTCGGCGGACGGTTCGTGTTT   |
| <i>NGN3</i>    | GGCTGTGGGTGCTAAGGGTAAG    | CAGGGAGAAGCAGAAGGAACAA   |
| <i>NKX22</i>   | TTCCAGAACCACCGCTACAAG     | GGGCGTCACCTCCATACCT      |
| <i>PAX6</i>    | CGAATTCTGCAGGTGTCCAA      | ACAGACCCCTCGGACAGTAAT    |
| <i>ARX</i>     | GGAGGCAGAAAGGCACAAAGA     | GGTGGGGTTAGATAGCGGGTT    |
| <i>PAX4</i>    | AGTGTCTCCTCCATCAACCG      | TGGTGACCTGAGCCGTGT       |
| <i>GCG</i>     | GAGATTTCCAGAAAGAGGTCG     | TGGCGGCAAGATTATCAAGAA    |
| <i>GCK</i>     | CTTCCCTCAGTTTTTTCGGTGG    | TTGATTCCAGCGAGAAAGGTG    |
| <i>INS</i>     | GCAGCCTTTGTGAACCAACAC     | CCCCGCACACTAGGTAGAGA     |
| <i>ISL1</i>    | ATTTCCCTATGTGTTGGTTGCG    | CGTTCTTGCTGAAGCCGATG     |
| <i>MAFB</i>    | CCCGACCGAACAGAAGACA       | ACTGGGTGCGAGCCGATGAG     |
| <i>SST</i>     | CGCTGTCCATCGTCCTG         | GGGCATCATTCTCCGCTCTG     |
| <i>GHRELIN</i> | GAGGCCCCAGCCGACAAGTG      | AAGCAAGCGAAAAGCCAGAT     |
| <i>PPY</i>     | AGTGTACCCAGGGGACAATGC     | CAGCATGTTGATGTATCTACGGA  |
| <i>MAFA</i>    | CAGAGCCAGGTGGAGCAGC       | CGTATTTCTCCTTGACAGGTCCC  |
| <i>CELA2A</i>  | CATCGTCAGCTTCGGGTCTCGC    | GAAGACGGAGGGCTTGTGGTAG   |
| <i>CTRB1</i>   | CGCCATCCACCCTGTGCTCA      | GACGGCGTCCTCCCCATTCA     |
| <i>CPA1</i>    | CCTGGGCTGGGTGGCTATGG      | GCGGCATCATTCATTTCTTTCA   |
| <i>CHGA</i>    | CGCAAACCGCAGACCAGAGGA     | AGCTCTGCTTCAATGGCCGACA   |
| <i>SUSD2</i>   | GGCACCGCCAACACCTCA        | GCGTGGGCAGCGACTTGA       |
