# Supplementary material
Source: PubMed Central journal article supplement (PMC4185345)
Supplement: cr2014118x11.pdf [file cr2014118x11.pdf]

**Supplementary information, Table S5. Primers used for gene targeting**

| Gene  |                  | Primers                                                                      |
|-------|------------------|------------------------------------------------------------------------------|
| NGN3  | Insert-left-F    | GGAAGATCT CTTTTGCGCCGGTAGAAAGGT                                              |
|       | Insert-left-R    | CGGGGTACC CAGAAAATCTGAGAAAGCCAG                                              |
|       | Insert-right-F   | CCGGAATTC AAGGACCTGTCTGTCTGCTGGGCTGT                                         |
|       | Insert-right-R   | GCGTCGAC GTCATCTTGCCAAGGCTTCTTGAAG                                           |
|       | Shorten-left-F   | GGAAGATCT GTTCATCTTGATCTCTCACTACCCA                                          |
|       | Shorten-left-R   | CGGGATCC GAATTATTAGAGAGTCTCTCCTACA                                           |
|       | Shorten-right-F  | TCCACCGGT CTCTCCCTATAGTGAGTCGTATTAG                                          |
|       | Shorten-right-R  | GGGGTACC ATTCAGTCAGTTGCTCAATGTACC                                            |
|       | Targeting-test-F | CCTTCTTGACGAGTTCTTCTGAGGGGAT                                                 |
|       | Targeting-test-R | GCAGAGGTGATGTGTGCTACTTCTGAGCAT                                               |
|       | probe-F          | ATCTGAGGTGAGTATTCCAGGTGGG                                                    |
|       | Probe-R          | CATGTTGAAGGTTTGGGGAGGGAA                                                     |
| FOXA2 | Insert-F         | atacctcactaccaggggtgtactcccggccattatgaactcctct<br>AAAATTGTCGCTCCTGTCAA       |
|       | Insert-R         | TCAAGGGATAAAACCGGTATAACACTTTAATATAGA<br>TTTGTGGAAGTCT tcgacggagctcgaattc     |
|       | Retrieve-F       | ggggagcctctggggttacgagctgggtccaggagagaaaagtcagaaaagc<br>ACTAGTGGATCCTCTAGAGT |
|       | Retrieve-R       | GTTCTGCGCGAACCCAAACCGCCTCCTGCACCCTG<br>GCGAGGTTCTGGGA GCGGCCGCTTTTTTCCTTGT   |
|       | Targeting-Test-F | GCTCTATGGCTTCTGAGGCGGAAAGAAC                                                 |
|       | Targeting-Test-R | GTTGCAGGGAGAATGCGATGATAAATGG                                                 |
|       | Insert-F         | cgtcgccacagccctccagcgtcgcgcctcggcggccgaggaaccacga<br>AAAATTGTCGCTCCTGTCAA    |
| PDX1  | Insert-R         | TCCAATGTGTATGGTACAGTTTCCATTGTCTTTGAAG<br>AGCCGGCTTCTCT tcgacggagctcgaattc    |
|       | Retrieve-F       | gagctcctgcaaaagctgaacgcagtagcctaccaagtcgcgcctgg<br>ACTAGTGGATCCTCTAGAGT      |
|       | Retrieve-R       | GCTGGCGGTGCTCCCCAAAATGGGCGCTCACGAAAA<br>CATTAGAACCACTC GCGGCCGCTTTTTTCCTTGT  |
|       | Targeting-Test-F | GCTCTATGGCTTCTGAGGCGGAAAGAAC                                                 |
|       | Targeting-Test-R | ACCTTACCTTGGGGTTGAAGATTCCAAG                                                 |
| SOX17 | Insert-F         | tggtgtccgagccagctccgcggtatattactgcaactatcctgacgtg<br>AAAATTGTCGCTCCTGTCAA    |
|       | Insert-R         | GGTTTTGACAATCCAATATGGGAAACAAATCTCTG<br>AACAAATTTTAAAT tcgacggagctcgaattc     |
|       | Retrieve-F       | caaattaagaaaagattctggctccagtagttccagtaataactgaaac<br>ACTAGTGGATCCTCTAGAGT    |
|       | Retrieve-R       | AACTATAGGAGGAGAGAGCAATCTACAAATTAAC<br>CCCGTAGTACCTTG GCGGCCGCTTTTTTCCTTGT    |
|       | Targeting-Test-F | AAGAGAAAATTCTGCTTTGAGAGCTTTG                                                 |
|       | Targeting-Test-R | CTCCTCGCCCTTGCTCACCATGGTGG                                                   |
|       | probe-F          | TCCTTCCCGATCGACTTGAGTGTCCTTC                                                 |

|             |                  |                                                                             |
|-------------|------------------|-----------------------------------------------------------------------------|
|             | Probe-R          | CGGGTTTCCCTATTTTTATTTGCCCTTG                                                |
| MAFB        | Insert-F         | GGGAGGCGGGCTCCACCAGCGACAGCCCCTCCTCTC<br>CCGAGTTCTTTCTG AAAATTGTCGCTCCTGTCAA |
|             | Insert-R         | GAAAGCCAGGAGTCTCCAGATGGCCTTGGTGACTTC<br>TCGGGACTATGCCT tcgacggagctcgaattc   |
|             | Retrieve-F       | CCCATACTGCAGTGGGAGCTGCCAGGAACCACGCCA<br>GATCCACCAGGCTG ACTAGTGGATCCTCTAGAGT |
|             | Retrieve-R       | CCTACCCCTGCCAGGCTGTGGGTGAATGACGGAGAC<br>ATGCAGGTGGCCGA GCGGCCGCTTTTTTCCTTGT |
|             | Targeting-Test-F | GCCGAGCCTGGCATGCTGATCCAGAGAC                                                |
|             | Targeting-Test-R | CTCCTCGCCCTTGCTCACCATGGTGG                                                  |
| PAX6        | Insert-F         | aagttcccgaagtgaacctgatatgtctcaactggccaagattacag<br>AAAATTGTCGCTCCTGTCAA     |
|             | Insert-R         | TGTTTCAAGTCCATTCCTTCCCCAGTGGTACAATACA<br>GGACACAATTGTA tcgacggagctcgaattc   |
|             | Retrieve-F       | catttcagagtgcgttttatcagaggaagacaaaatacacaccctc<br>ACTAGTGGATCCTCTAGAGT      |
|             | Retrieve-R       | TATATCCCGACAGCCTCACCAAAACATCCCAAGGTA<br>ACTGTCAGCCTTC GCGGCCGCTTTTTTCCTTGT  |
|             | Targeting-Test-F | AGTGAGGCATTTGGGGAGTTGGGGTTAC                                                |
|             | Targeting-Test-R | CTCCTCGCCCTTGCTCACCATGGTGG                                                  |
| NKX6.1      | Insert-F         | accagccagcgcctcgtcgaaggctacggctcggcgtggccgtggg<br>GCCACCATGGTGAGCAAGGG      |
|             | Insert-R         | GCGGCGGCGGCGGCCTCCTACTGCACGCGTCCGAGC<br>CGGAGAGCTCATCC AAAATTGTCGCTCCTGTCAA |
|             | Retrieve-F       | gaagactttaaagagtagagcataatgtctgcatgggtttgatattac<br>ACTAGTGGATCCTCTAGAGT    |
|             | Retrieve-R       | AGCGAGAATCCCTTTCTGGAAGCCCTGGCCCAACCT<br>AACTGGTGTGATTC GCGGCCGCTTTTTTCCTTGT |
|             | Targeting-Test-F | GATGCCTGCCTGCCGTGCCTGTTCTGCC                                                |
|             | Targeting-Test-R | CTCCTCGCCCTTGCTCACCATGGTGG                                                  |
| NEURO<br>D1 | Insert-F         | CACATCATGAGCGAGTCATGAGTGCCCAGCTCAATG<br>CCATATTTATGAT AAAATTGTCGCTCCTGTCAA  |
|             | Insert-R         | CCTGTTTCTTCCAAAGGCAGTAATGACAATAAATACA<br>TATATCACTTGAA tcgacggagctcgaattc   |
|             | Retrieve-F       | GATGGGGAAACTTCAGGAAGTTGAGATACCTAGATA<br>TTTGCATTCTGTC ACTAGTGGATCCTCTAGAGT  |
|             | Retrieve-R       | GATTCAGACAAGCGTTTTCAAAGAGAAGATGCAATG<br>GGCCTGTGCTGAAC GCGGCCGCTTTTTTCCTTGT |
|             | Targeting-Test-F | ACTGGTCGAGAATTTCTGTGGTCTTTGC                                                |
|             | Targeting-Test-R | CTCCTCGCCCTTGCTCACCATGGTGG                                                  |
| INS         | Insert-F         | aatgctgtaccagcatctgctccctctaccagctggagaactactgcaac<br>AAAATTGTCGCTCCTGTCAA  |
|             | Insert-R         | CTGAACAAGAAGTCACTTCTCAGTGGCCCCACCACC<br>CCTGGCCCCTCAG tcgacggagctcgaattc    |
|             | Retrieve-F       | ccttctcccactattgtttctggcctcgcccgaggaacagcaaggcag<br>ACTAGTGGATCCTCTAGAGT    |

|            |                  |                                                                             |
|------------|------------------|-----------------------------------------------------------------------------|
|            | Retrieve-R       | GAGGCTGGAGGGAAAATGATGAGACCTTTTATGAGG<br>ATGAGGCTAGAGGG GCGGCCGCTTTTTTCCTTGT |
|            | Targeting-Test-F | GGATGGGGAGAAGTCAGGGGGATAGACA                                                |
|            | Targeting-Test-R | CTCCTCGCCCTTGCTCACCATGGTGG                                                  |
| Tdtm probe | Tdtm-probe-F     | GTCATCAAAGAGTTCATGCGCTTC                                                    |
|            | Tdtm-probe-R     | CAGGAACAGGTGGTGGCGGCCCTCG                                                   |
